# Supplementary material for: The role of the Ca vacancy in the determination of the europium position in the energy gap, its valence state and spectroscopic properties in KCa(PO3)3
Source: Royal Society of Chemistry journal article supplement (doi:10.1039/c3cp54875a), 2014-01-01
Supplement: c3cp54875a.pdf [file c3cp54875a.pdf]

## Supplementary Materials

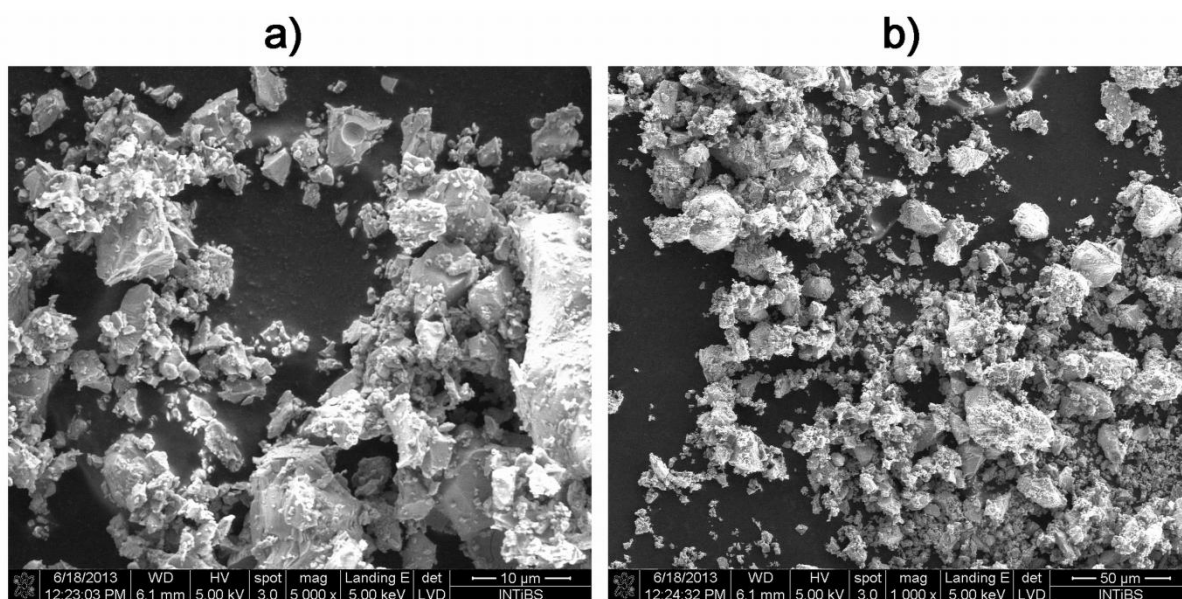

**Figure 1\_S.** SEM images of  $\text{KCa}(\text{PO}_3)_3$  doped with 5% of  $\text{Eu}^{3+}$  ions.

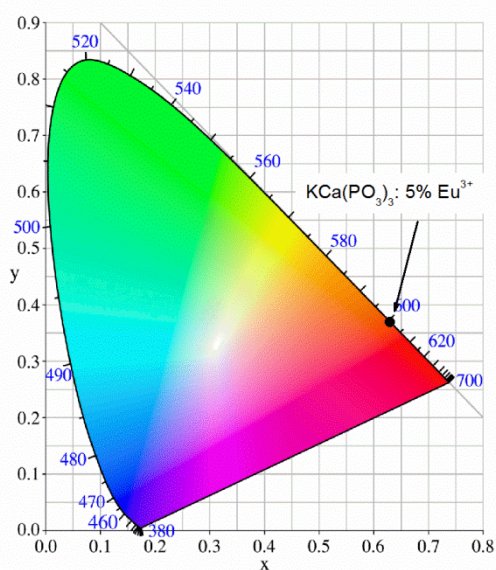

**Figure 2\_S.** The CIE chromacity diagram of  $\text{KCa}(\text{PO}_3)_3: 5\% \text{Eu}^{3+}$  under 395 nm excitation.

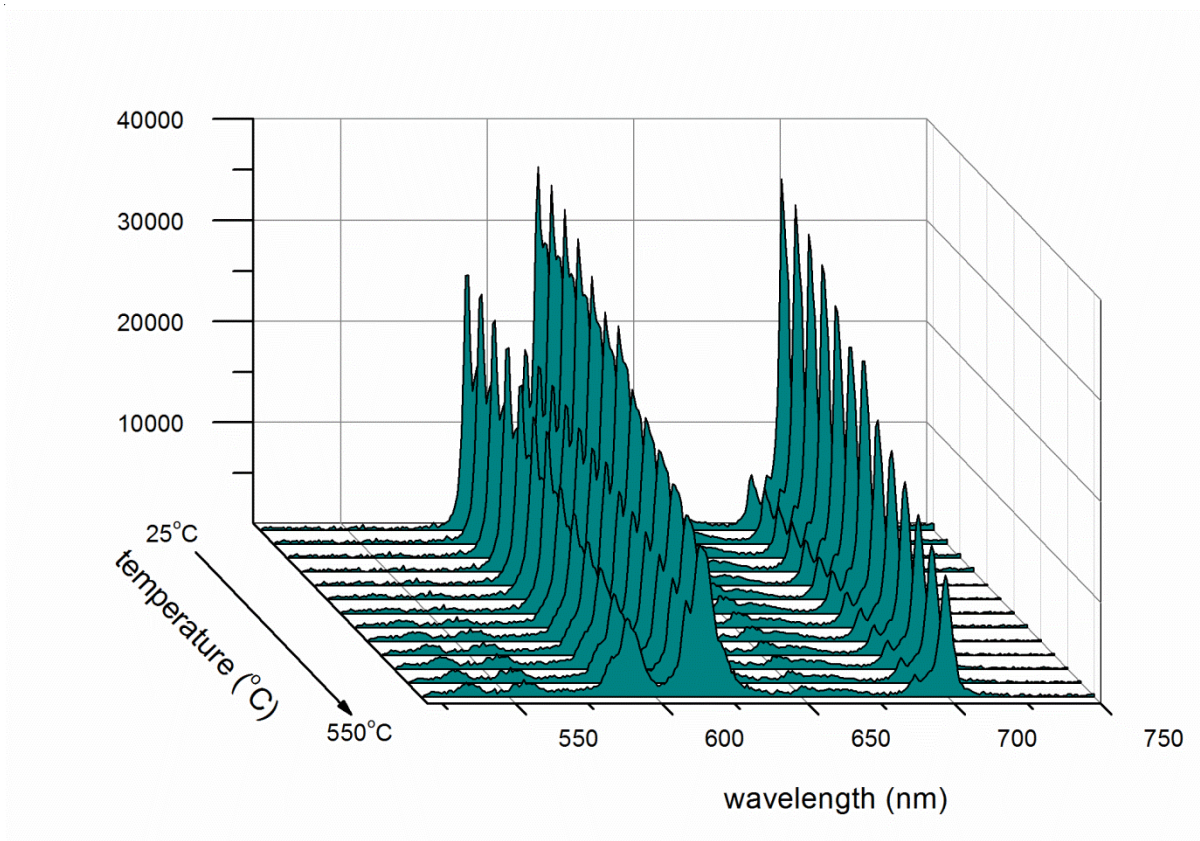

**Figure 3\_S.** The emission spectra of KCa(PO<sub>3</sub>)<sub>3</sub> doped with Eu<sup>3+</sup> ions in function of surrounding temperature.
